# Supplementary material for: Mutual effects andin plantaaccumulation of co-existing cerium oxide nanoparticles and cadmium in hydroponically grown soybean (Glycine max(L.) Merr.)
Source: Royal Society of Chemistry journal article supplement (doi:10.1039/c7en00931c), 2017-11-14
Supplement: c7en00931c1.pdf [file c7en00931c1.pdf]

## Supplementary Information

### **Mutual effects and *in-planta* speciation of cerium oxide nanoparticles and cadmium in hydroponically grown soybean (*Glycine max* (L.) Merr.)**

Lorenzo Rossi<sup>1,a,c</sup>, Hamidreza Sharifan<sup>1,c</sup>, Weilan Zhang<sup>1,b</sup>, Arthur P. Schwab<sup>2</sup>, Xingmao Ma<sup>1,\*</sup>

<sup>1</sup> Zachry Department of Civil Engineering, Texas A&M University, TAMU 3136, College Station, TX 77843-3136, USA

<sup>2</sup> Department of Soil and Crop Science, Texas A&M University, TAMU 2474, College Station, TX 77843-2474, USA

\*For correspondence:

Dr. Xingmao Ma

Zachry Department of Civil Engineering

Texas A&M University

TAMU 3136, College Station, TX 77843-3136 USA

<sup>a</sup> Current Address: Center for Research in Energy and Environment, Dept. of Civil, Architectural and Environmental Engineering, Missouri University of Science & Technology, Rolla, MO, USA

<sup>b</sup> Current Address: Department of Civil and Environmental Engineering, Hong Kong University of Science & Technology, Hong Kong, China

<sup>c</sup> These authors contributed equally to the manuscript.

**Table S1** –*p* values from Two-way ANOVA analysis

| <b>Two-way ANOVA</b>             |                           | <i>p</i>         |
|----------------------------------|---------------------------|------------------|
| Root DW (g)                      | CeO <sub>2</sub> NPs      | 0.393            |
|                                  | Cd                        | 0.861            |
|                                  | CeO <sub>2</sub> NPs × Cd | 0.326            |
| Shoot DW (g)                     | CeO <sub>2</sub> NPs      | <b>0.002</b>     |
|                                  | Cd                        | <b>0.008</b>     |
|                                  | CeO <sub>2</sub> NPs × Cd | 0.064            |
| Root Ce (mg/kg)                  | CeO <sub>2</sub> NPs      | <b>&lt;0.001</b> |
|                                  | Cd                        | <b>0.003</b>     |
|                                  | CeO <sub>2</sub> NPs × Cd | <b>0.003</b>     |
| Shoot Ce (mg/kg)                 | CeO <sub>2</sub> NPs      | <b>&lt;0.001</b> |
|                                  | Cd                        | <b>&lt;0.001</b> |
|                                  | CeO <sub>2</sub> NPs × Cd | <b>&lt;0.001</b> |
| Root Cd (mg/kg)                  | CeO <sub>2</sub> NPs      | 0.742            |
|                                  | Cd                        | <b>&lt;0.001</b> |
|                                  | CeO <sub>2</sub> NPs × Cd | 0.716            |
| Shoot Cd (mg/kg)                 | CeO <sub>2</sub> NPs      | <b>&lt;0.001</b> |
|                                  | Cd                        | <b>&lt;0.001</b> |
|                                  | CeO <sub>2</sub> NPs × Cd | <b>&lt;0.001</b> |
| Ce ions (mg/kg)                  | CeO <sub>2</sub> NPs      | <b>&lt;0.001</b> |
|                                  | Cd                        | <b>0.035</b>     |
|                                  | CeO <sub>2</sub> NPs × Cd | <b>0.029</b>     |
| Other forms of Ce (mg/kg)        | CeO <sub>2</sub> NPs      | <b>&lt;0.001</b> |
|                                  | Cd                        | <b>0.004</b>     |
|                                  | CeO <sub>2</sub> NPs × Cd | <b>0.003</b>     |
| Total Ce growth medium (μg/L)    | CeO <sub>2</sub> NPs      | <b>&lt;0.001</b> |
|                                  | Cd                        | 0.359            |
|                                  | CeO <sub>2</sub> NPs × Cd | 0.357            |
| Total Ce washing solution (μg/L) | CeO <sub>2</sub> NPs      | <b>&lt;0.001</b> |
|                                  | Cd                        | 0.122            |
|                                  | CeO <sub>2</sub> NPs × Cd | 0.125            |
| TOC (g/L)                        | CeO <sub>2</sub> NPs      | 0.114            |
|                                  | Cd                        | <b>0.017</b>     |
|                                  | CeO <sub>2</sub> NPs × Cd | 0.147            |

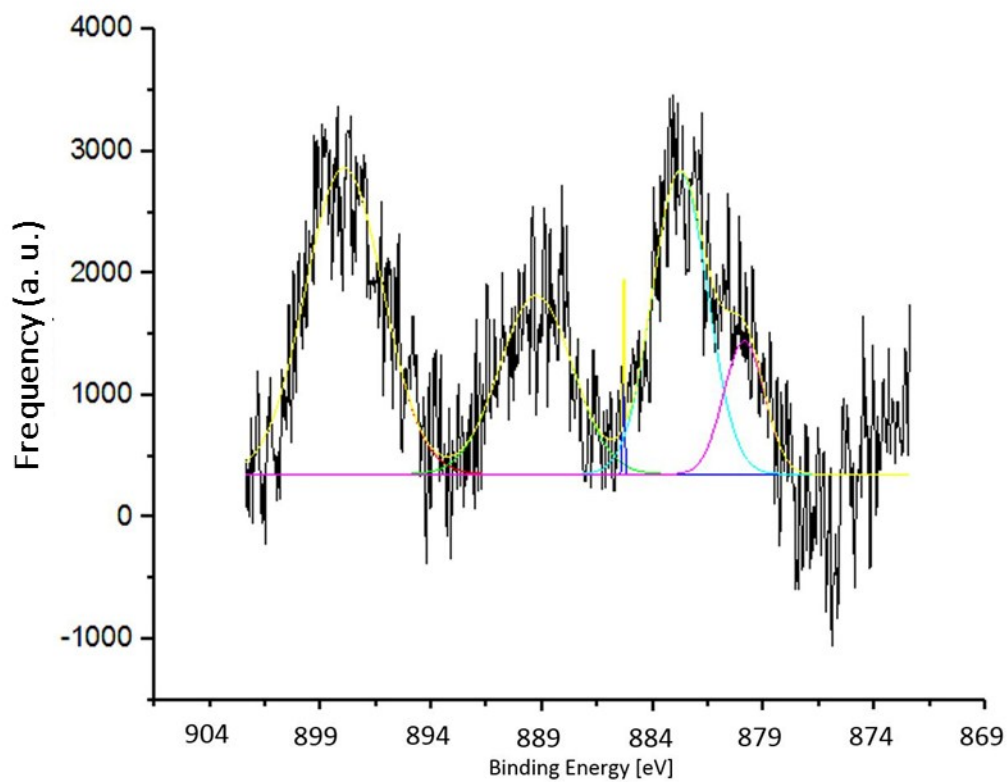

**Suppl. Fig. 1:** Analytical XPS spectrum for five fitting peaks of  $\text{CeO}_2$  generated by Gaussian function of Origin Software 2017. The horizontal axis is the associated binding energy [eV] and the arbitrary unit represents the frequency of the peaks. The  $\text{CeO}_2$  spectrum analysis yielded a ratio of  $\text{Ce}^{4+}$ :  $\text{Ce}^{3+}$  of 90%:10%.

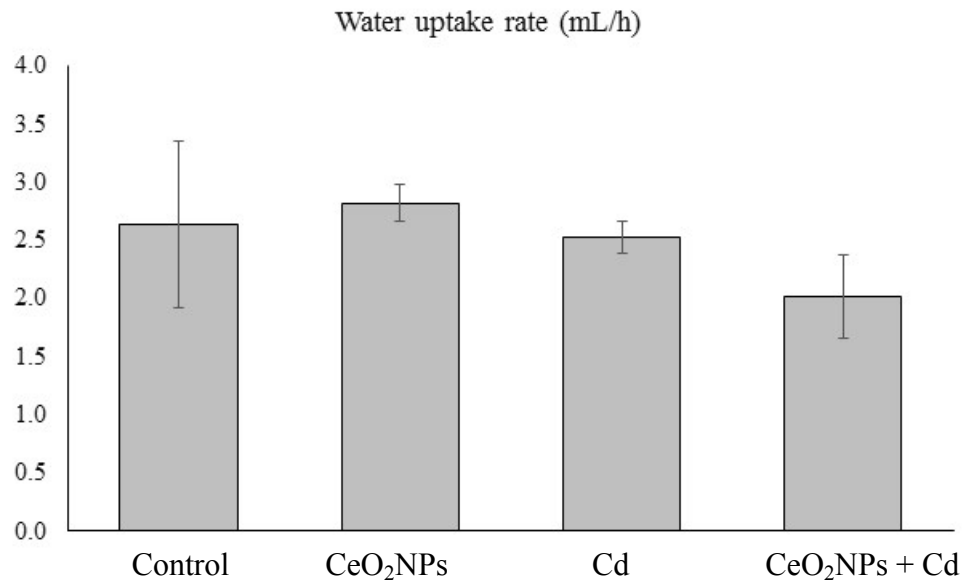

**Suppl. Fig. 2** – Water uptake of *Glycine max* grown in the presence of 100 mg L<sup>-1</sup> CeO<sub>2</sub>NPs and 1 mg L<sup>-1</sup> Cd. No statistically significant differences were found by Games-Howell's non parametric post-hoc test ( $p < 0.05$ ). Error bars represent the standard deviation (n=3).
